# Supplementary material for: Enhanced capacitive performance by improving the graphitized structure in carbon aerogel microspheres
Source: Royal Society of Chemistry journal article supplement (doi:10.1039/d0ra01735c), 2020-01-01
Supplement: d0ra01735c1.pdf [file d0ra01735c1.pdf]

## Electronic Supplementary Information

### Enhanced Capacitive Performance by Improving the Graphitized Structure in Carbon Aerogels Microsphere

Xichuan Liu,<sup>ab</sup> Lei Yuan,<sup>a</sup> Minglong Zhong,<sup>a</sup> Shuang Ni,<sup>a</sup> Fan Yang,<sup>a</sup> Zhibing Fu,<sup>a</sup> Xibin Xu,<sup>a</sup> Chaoyang Wang<sup>†a</sup> and Yongjian Tang<sup>†ab</sup>

#### Morphologies information.

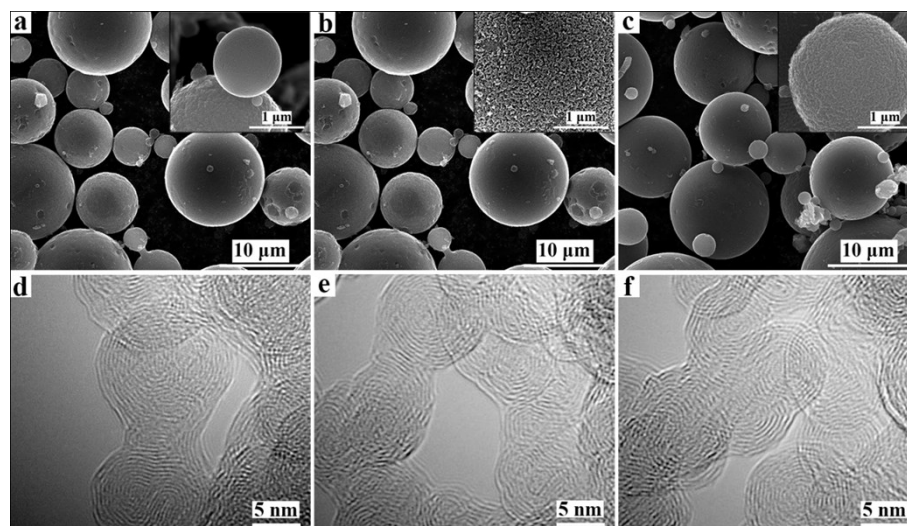

**Fig. S1** SEM images (a, b and c) and HRTEM images (c, d and f) of G1500, G2000 and G2500, respectively.

It can be observed that the morphologies of GCP are almost the same as that of CP with spherical in shape and diameters of 1–15  $\mu\text{m}$  (Fig. 2(a)), possessing a smooth surface without cracks and impurity at high magnification. Many small irregular lattice fringes can be observed from HRTEM image of CP (Fig. 2c), which indicates the existence of graphite crystallite or disorder graphite layers in CP. It is obviously that the lattice fringes became more clear and regular with the increase of graphitization temperature.

<sup>a</sup> Science and Technology on Plasma Physics Laboratory, Research Centre of Laser Fusion, China Academy of Engineering Physics, Mianyang 619000, China.

<sup>b</sup> Shanghai EBIT Lab, Key Laboratory of Nuclear Physics and Ion-beam Application, Institute of Modern Physics, Department of Nuclear Science and Technology, Fudan University, Shanghai 200433, China.

<sup>†</sup>Corresponding author. Tel: +8608162480862; E-mail address: [wangchy807@caep.cn](mailto:wangchy807@caep.cn) (Chaoyang Wang)

<sup>†</sup>Corresponding author. Tel: +8608162480867; E-mail address: [tangyongjian2000@sina.com](mailto:tangyongjian2000@sina.com) (Yongjian Tang).

## XPS study

XPS was employed to evaluate the surface chemistry in CAs. As shown in Fig. S2, only two main groups of spectral peaks identified in the XPS spectra of CAs, corresponding to C1s and O1s.

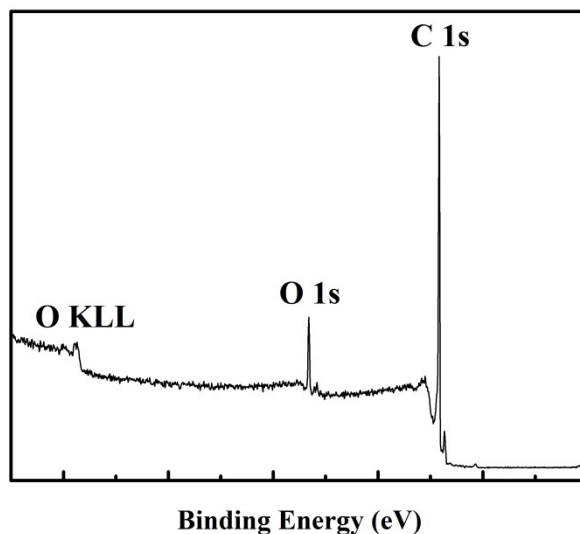

Fig. S2 XPS spectrum of the CAs.

## Porous properties

Table S1. Corresponding pore parameters of the CAs, GCAs and activated samples.

| Sample | $S_{\text{BET}} / (\text{m}^2 \text{g}^{-1})$ | $V_t / (\text{cm}^3 \text{g}^{-1})$ | Activated sample | $S_{\text{BET}} / (\text{m}^2 \text{g}^{-1})$ | $V_t / (\text{cm}^3 \text{g}^{-1})$ |
|--------|-----------------------------------------------|-------------------------------------|------------------|-----------------------------------------------|-------------------------------------|
| CAM    | 42.9                                          | 0.048                               | CAM-8            | 1107                                          | 0.575                               |
| G1500  | 22.3                                          | 0.031                               | G1500-8          | 715                                           | 0.484                               |
| G2000  | 14.5                                          | 0.025                               | G2000-8          | 49                                            | 0.071                               |
| G2500  | 9.8                                           | 0.018                               | G2500-8          | 30                                            | 0.045                               |
| G2800  | 6.6                                           | 0.017                               | G2800-8          | 19                                            | 0.030                               |

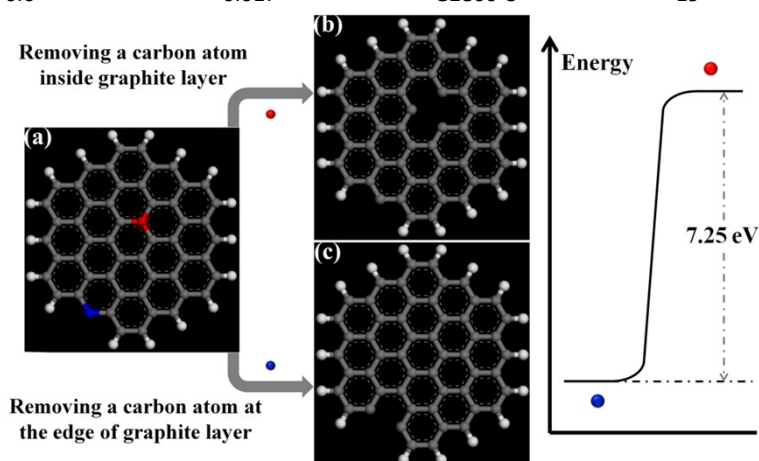

Fig. S3 Schematic diagram of removing a carbon atom from the interior and edge of the graphite layer.

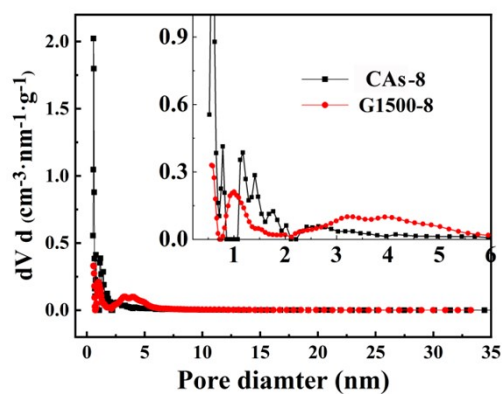

Fig. S4 The pore size distribution of the CAs and G1500-8.

## Electrochemical performance

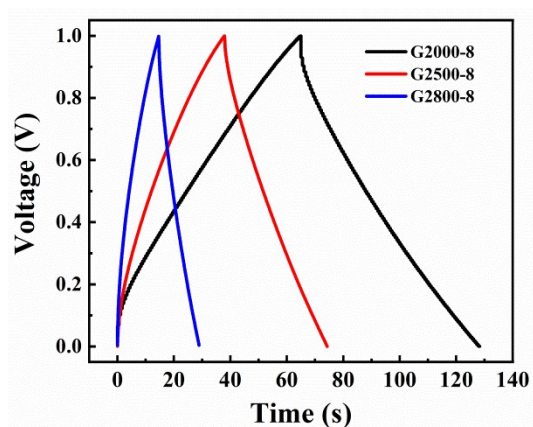

Fig. S5 The Galvanostatic charge-discharge curves of G2000-8, G2500-8 and G2800-8 at  $0.05 \text{ A g}^{-1}$ .

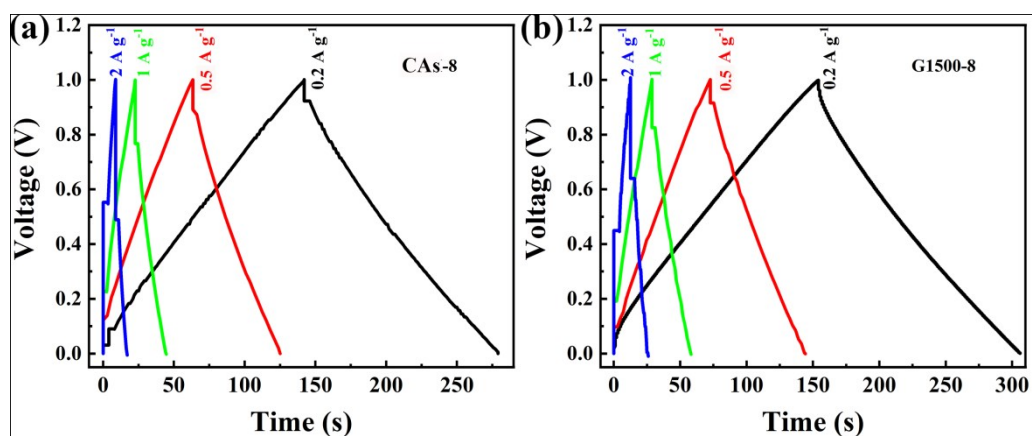

Fig. S6 The Galvanostatic charge-discharge curves of CAs and G1500-8 at different current density.
